# Supplementary material for: Incidence and mortality of lung cancer: global trends and association with socioeconomic status
Source: PubMed Central journal article supplement (PMC5662733; doi:10.1038/s41598-017-14513-7), 2017-10-30

# **Incidence and mortality of lung cancer: global trends and association with socioeconomic status**

Martin CS Wong MD, MPH<sup>a, b</sup>, Xiang Qian Lao PhD<sup>c</sup>, Kin-Fai Ho PhD<sup>c</sup>, William B Goggins DSc (Harvard)<sup>d</sup>, Shelly LA Tse PhD<sup>c</sup>

- a. Division of Family Medicine and Primary Healthcare, School of Public Health and Primary Care, Faculty of Medicine, Chinese University of Hong Kong
- b. Family Medicine and Primary Health Care, Hospital Authority, Hong Kong
- c. Division of Occupational and Environmental Health, School of Public Health and Primary Care, Faculty of Medicine, Chinese University of Hong Kong
- d. Division of Biostatistics, School of Public Health and Primary Care, Faculty of Medicine, The Chinese University of Hong Kong.

**Corresponding Author:** Martin C.S. Wong

BMedSc (Hons), MSc (Hons), MBChB, MD, MPH, MBA, FRSPH, FRSP, FRIPH, FRACGP, FHKCFP, DCH, FHKAM

Professor of Family Medicine and Primary Healthcare, JC School of Public Health and Primary Care, Faculty of Medicine, The Chinese University of Hong Kong

Consultant (Honorary), Department of Family Medicine, Hospital Authority

**Tel:** (852) 2252 8782 **Fax:** (852) 2606 3500; **Email:** [wong\\_martin@cuhk.edu.hk](mailto:wong_martin@cuhk.edu.hk)

**Address:** 4/F, School of Public Health, Prince of Wales Hospital, Shatin, N.T., Hong Kong

7/F, Lui Che Woo Clinical Science Building, Prince of Wales Hospital, Shatin, NT, HKSAR.

**Supplementary Figure 1      The age-standardized incidence and mortality rates (World) of lung cancer in 2012**

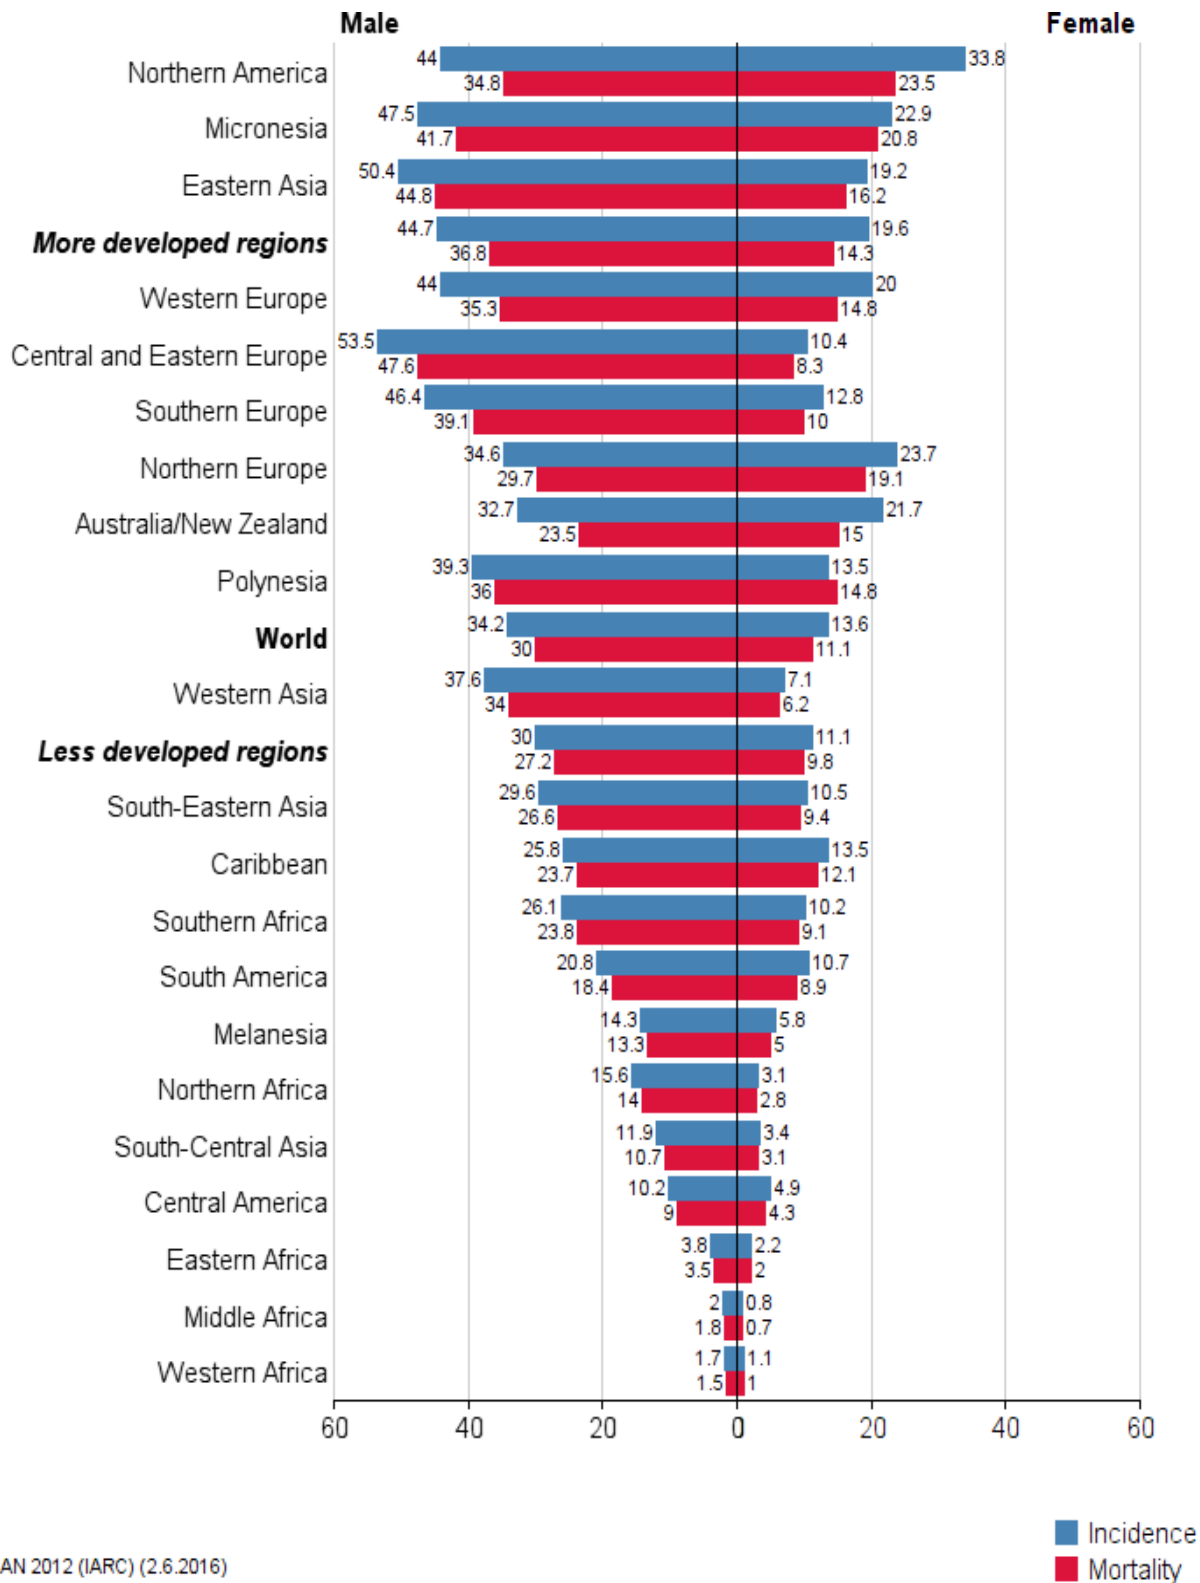

GLOBOCAN 2012 (IARC) (2.6.2016)

**Source:** Ferlay J, Soerjomataram I, Ervik M et al. GLOBOCAN 2012 v1.0, Cancer Incidence and Mortality Worldwide. IARC Cancer Base No. 11. Lyon, France: International Agency for Research on Cancer, 2013.

# Supplementary Figure 2 Findings from the joinpoint regression analysis of the global incidence rates of lung cancer (Left: Male, Right: Female)

## 1) Latin America and the Caribbean

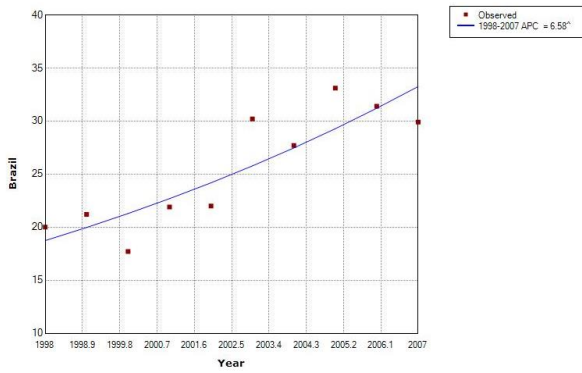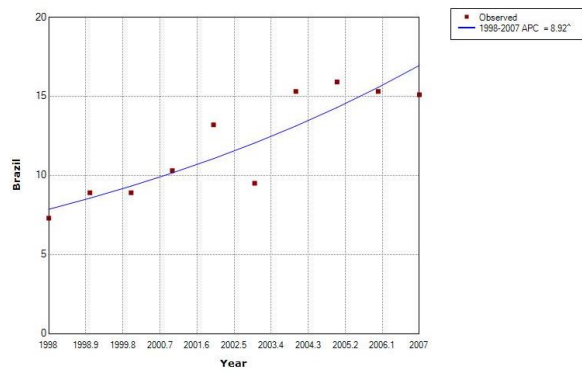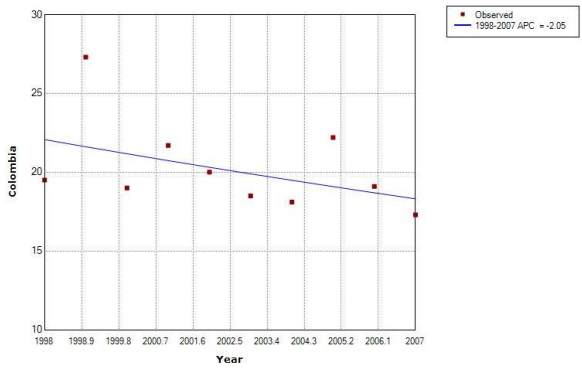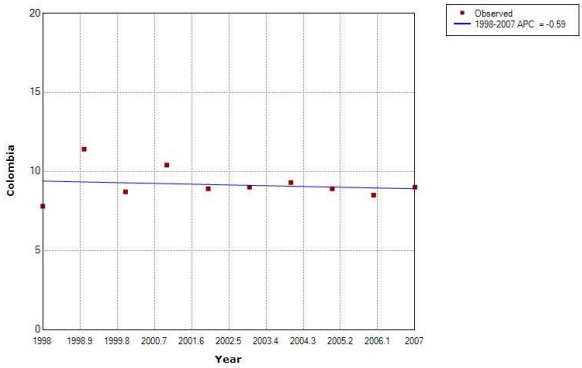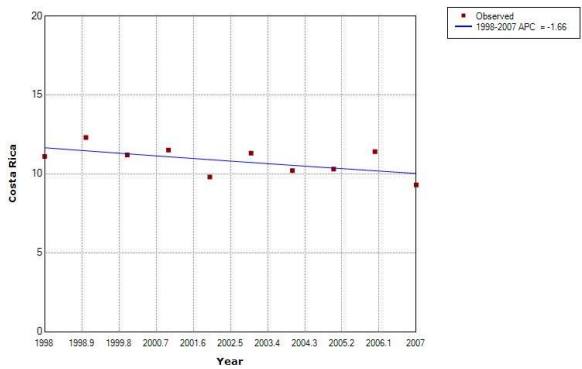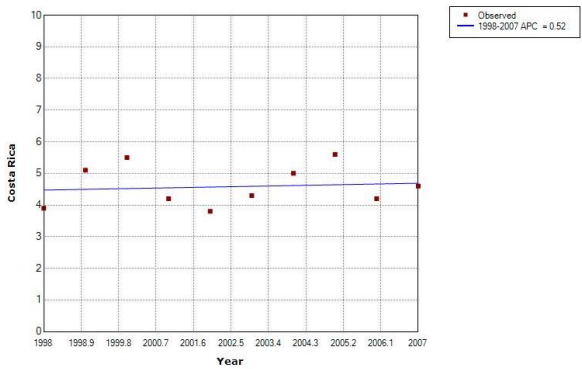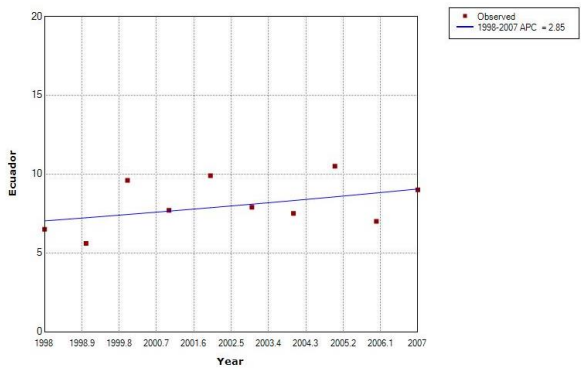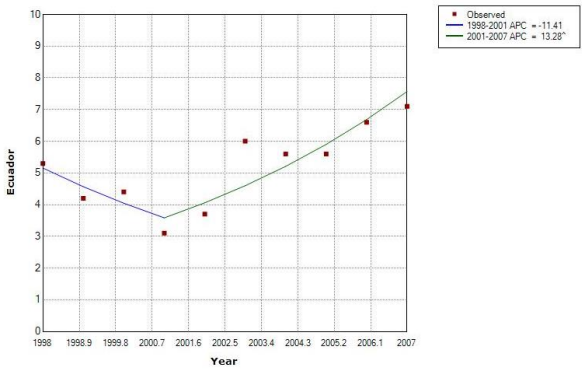

## 2) Northern America

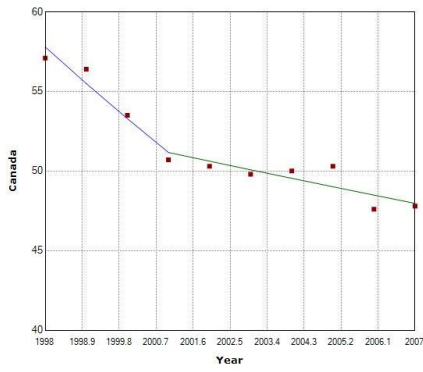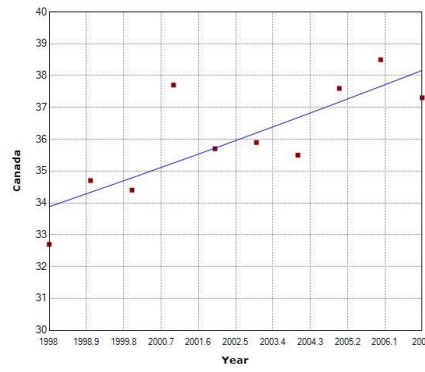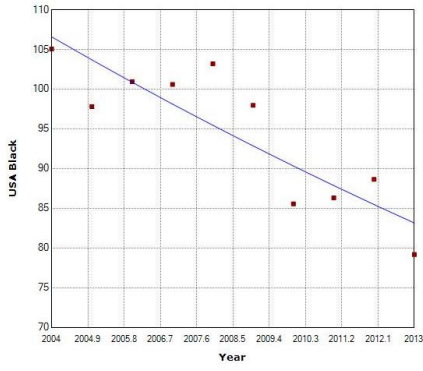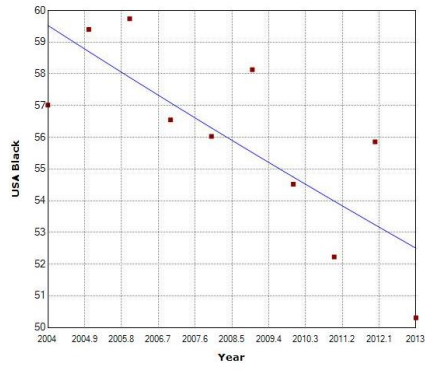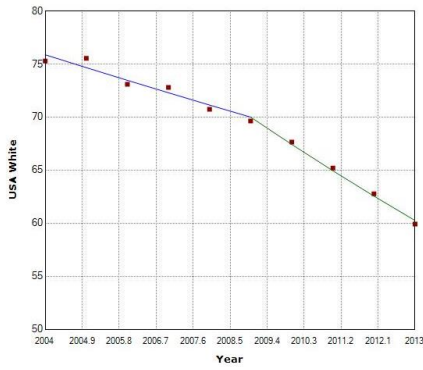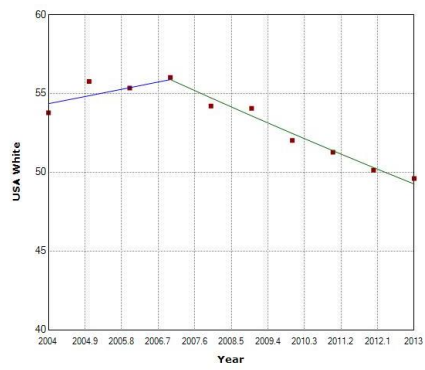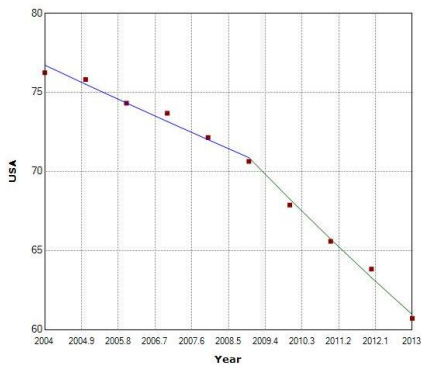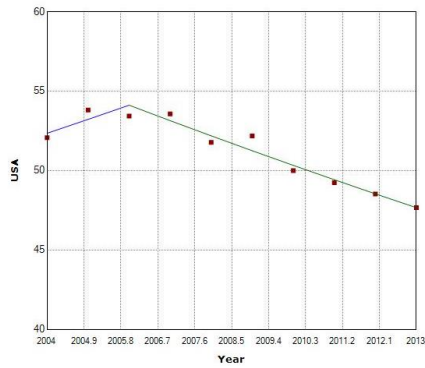

### 3) Asia

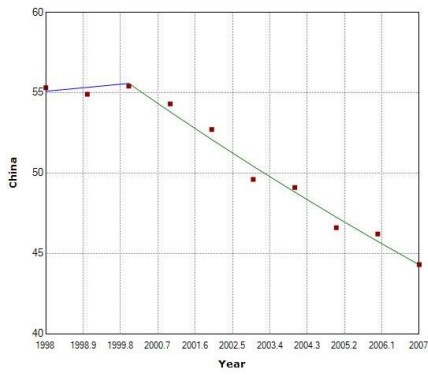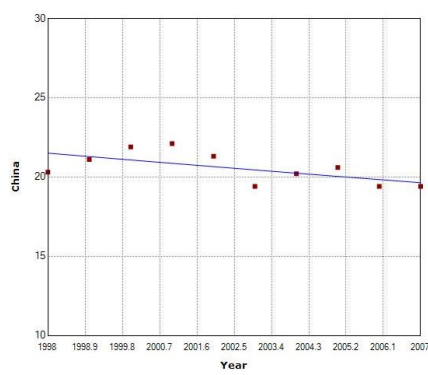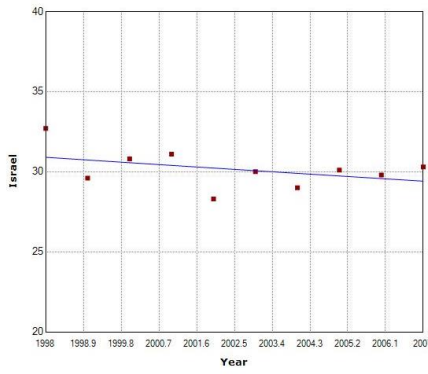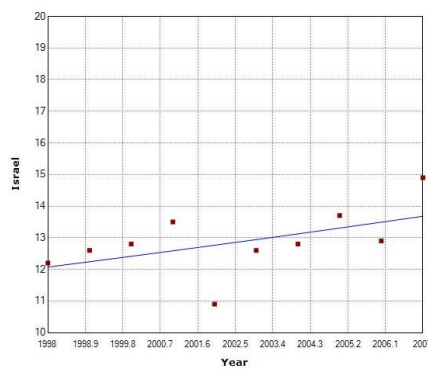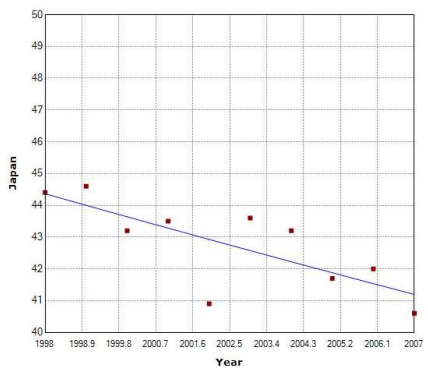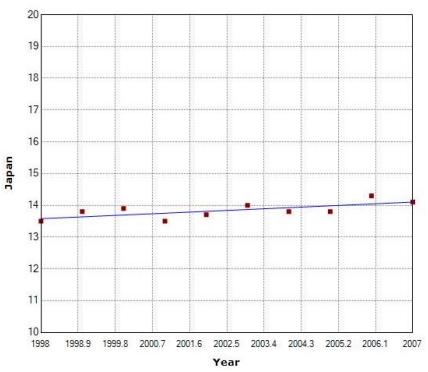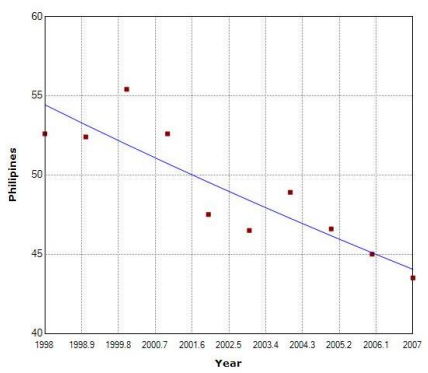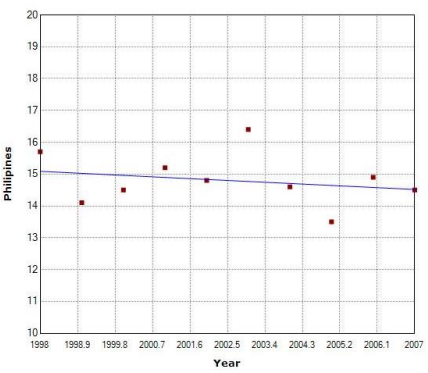

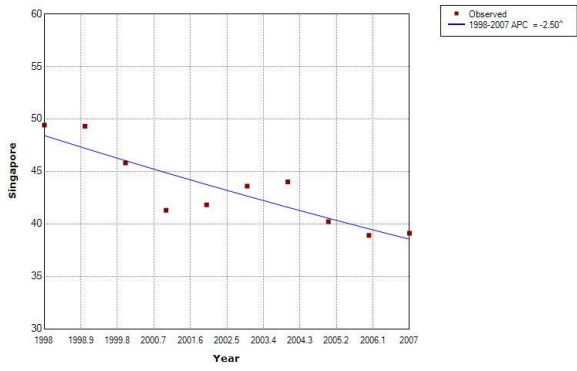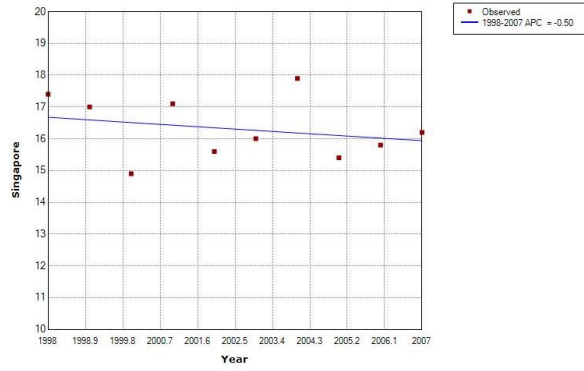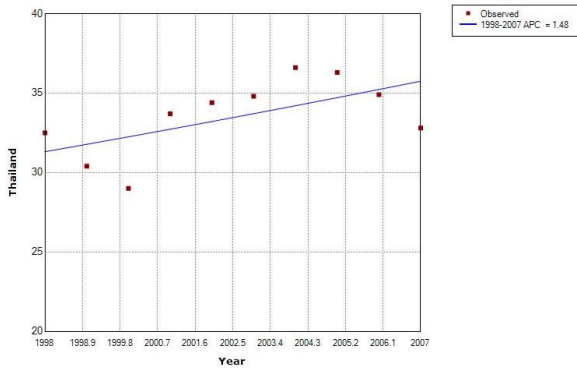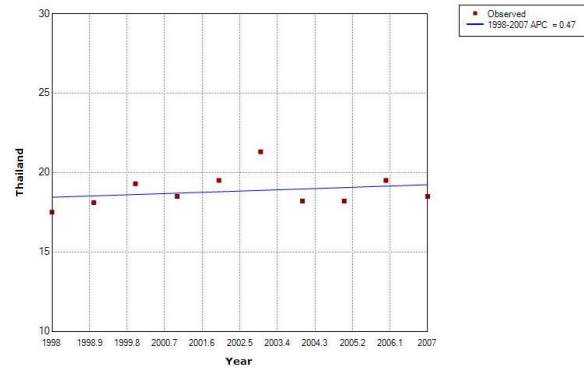

#### 4) Oceania

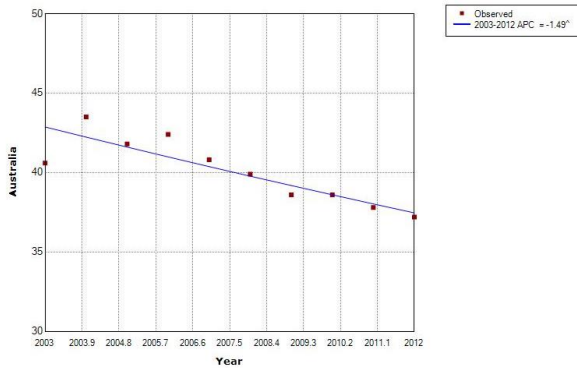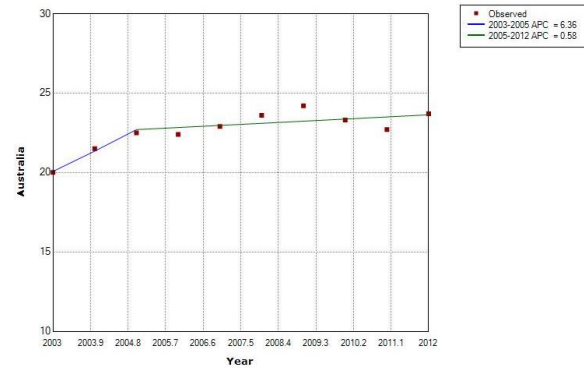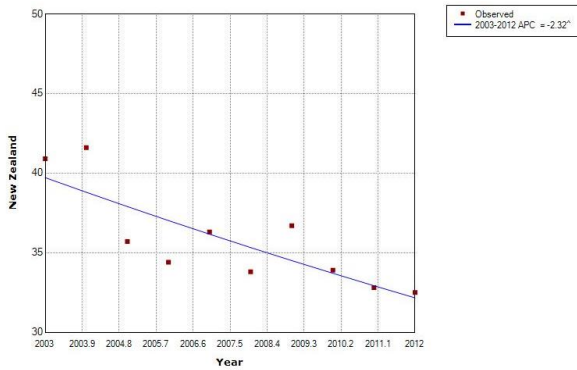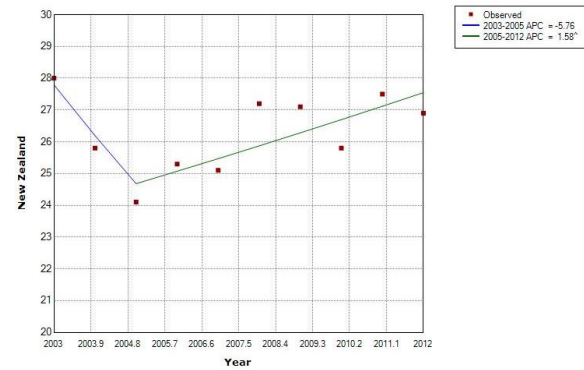

## 5) Northern Europe

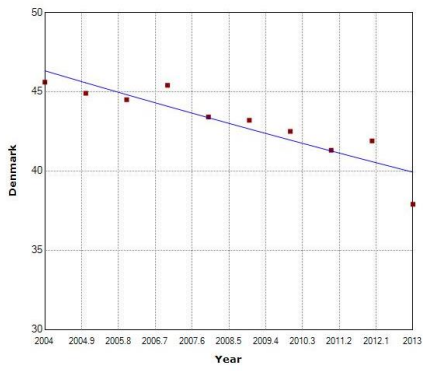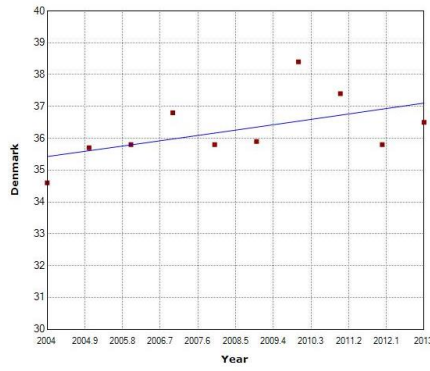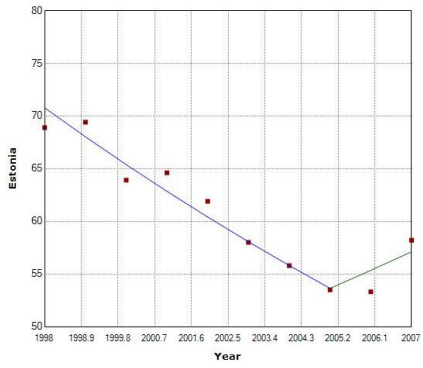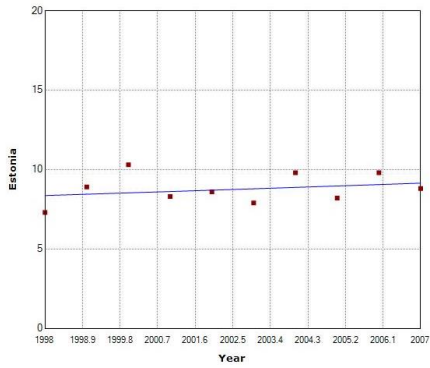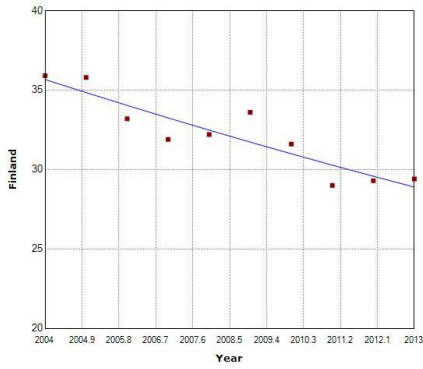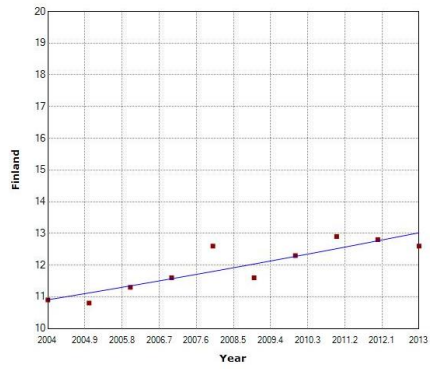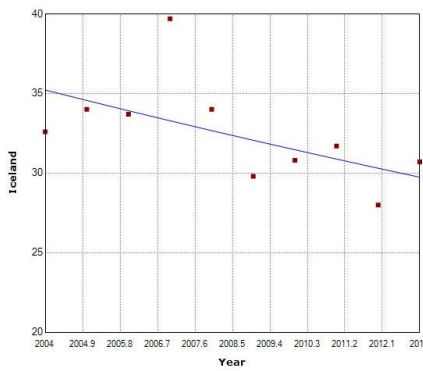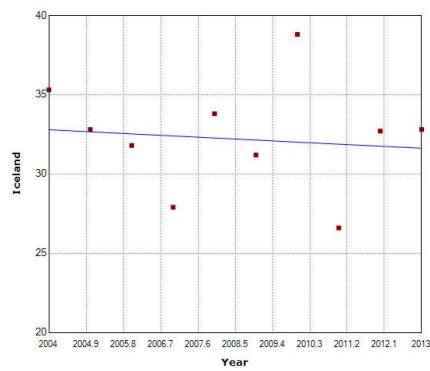

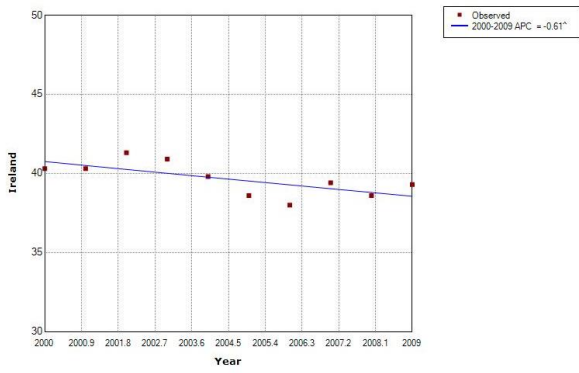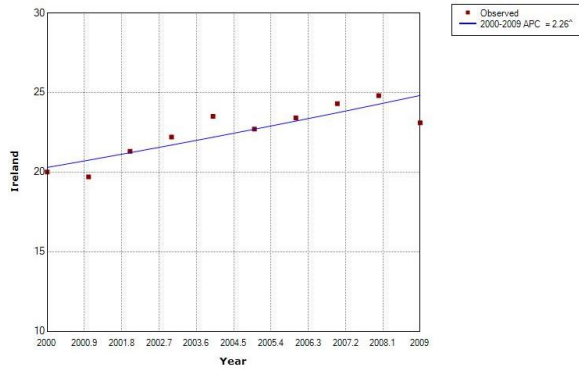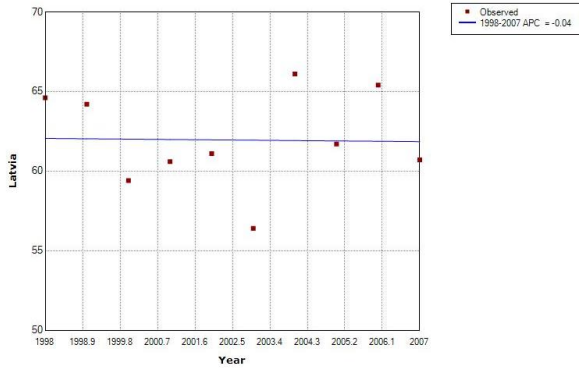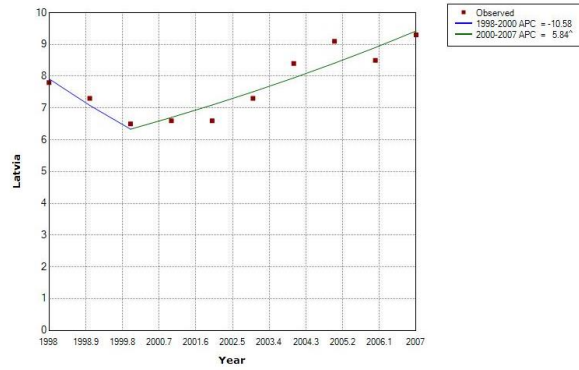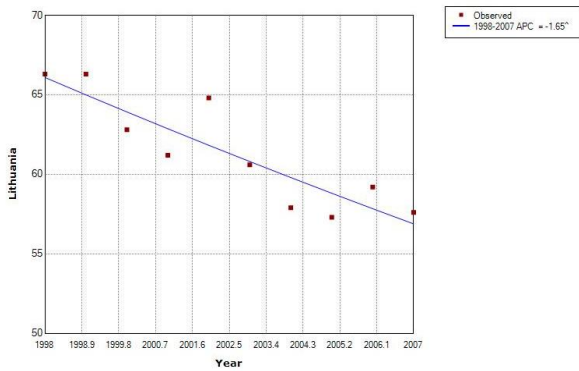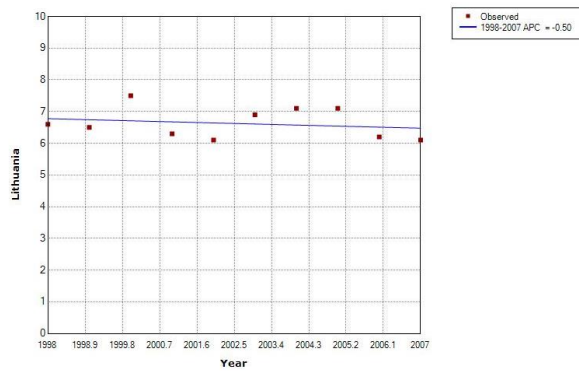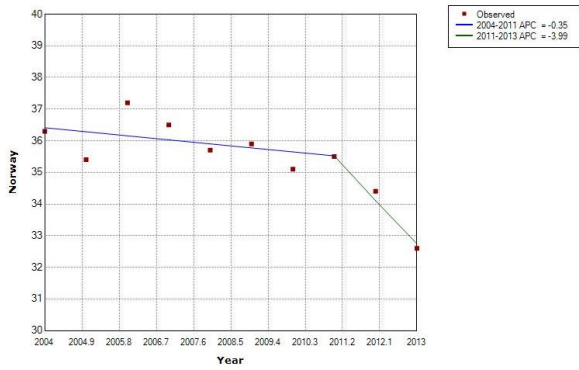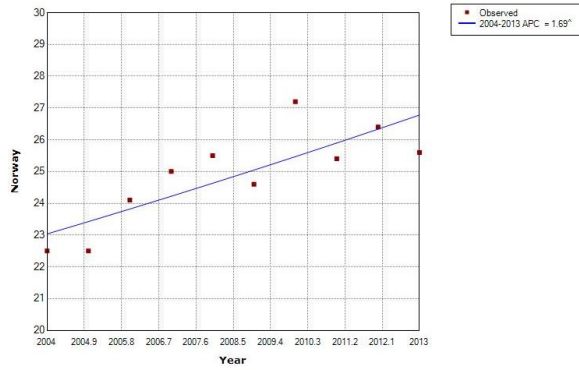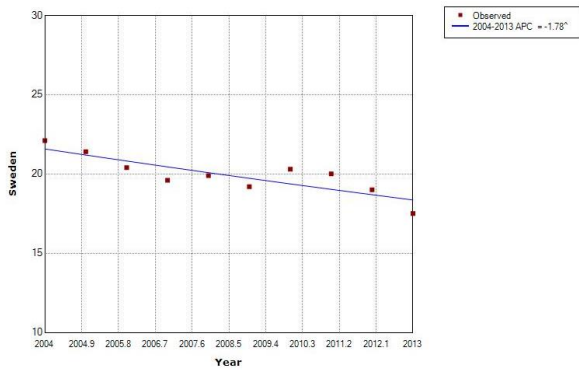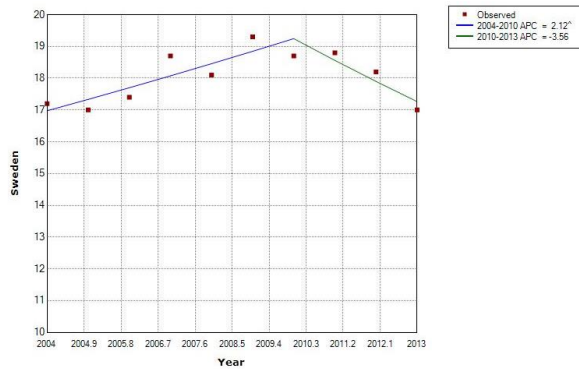



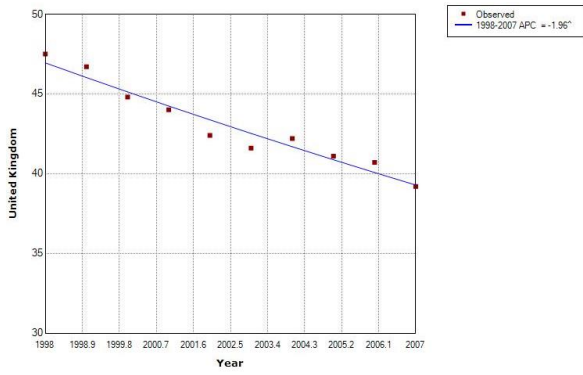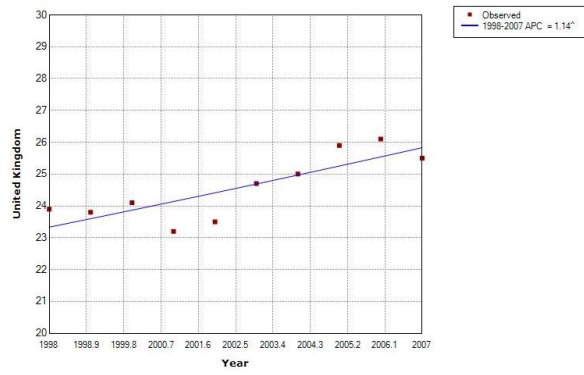

## 6) Western Europe

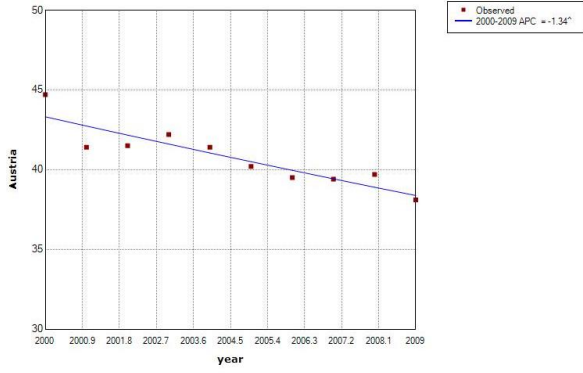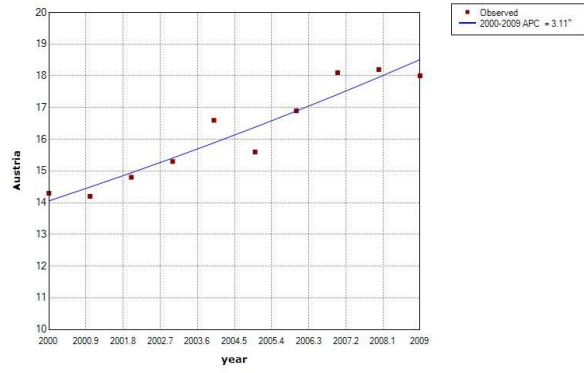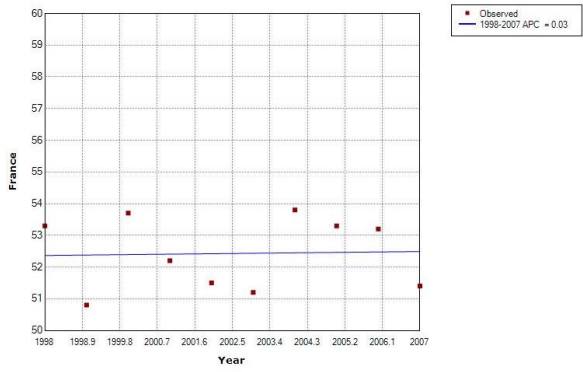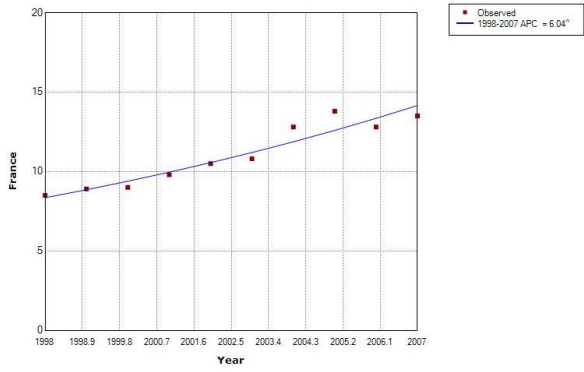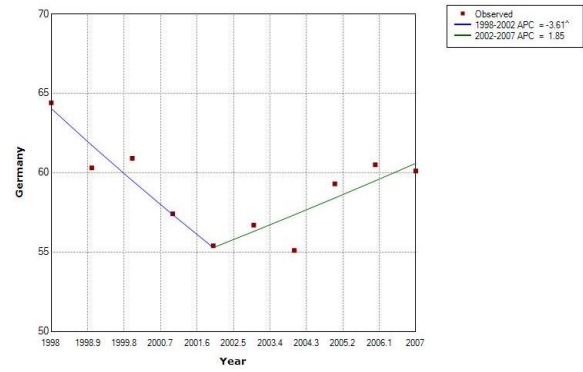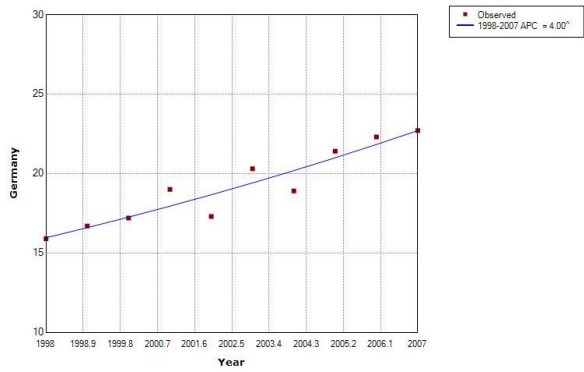

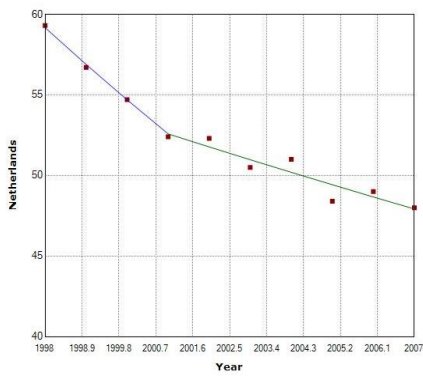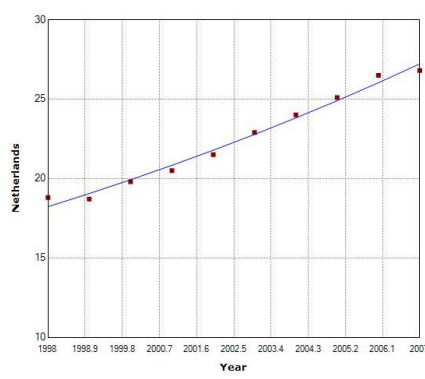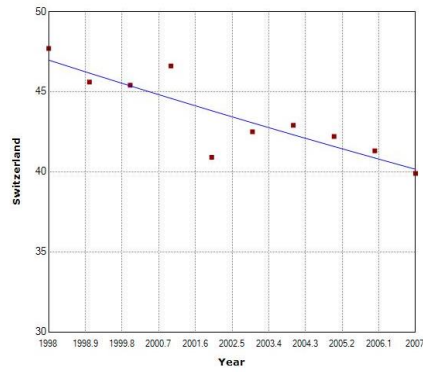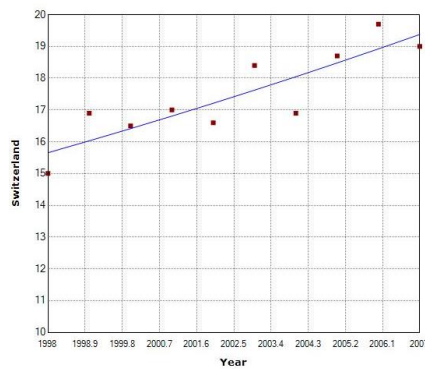

## 7) Southern Europe

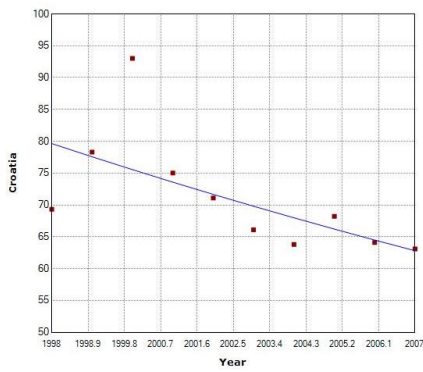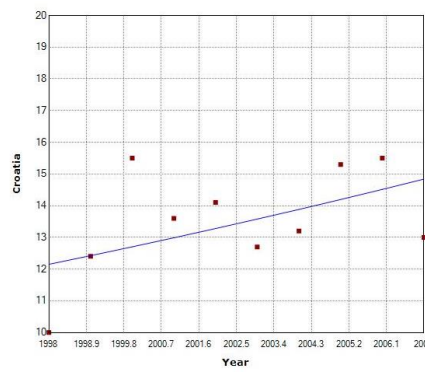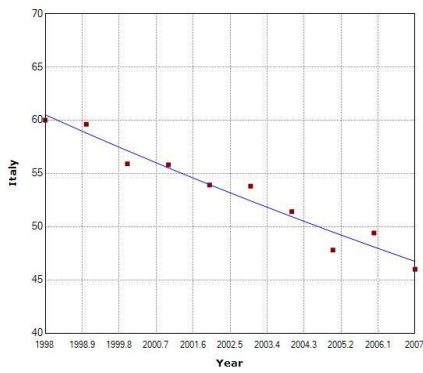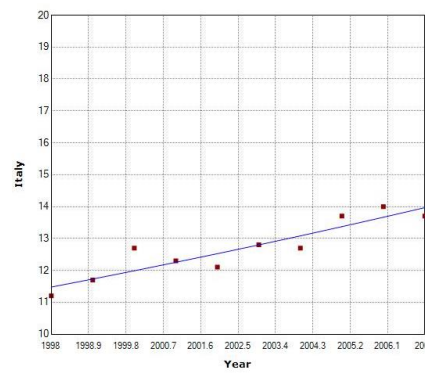

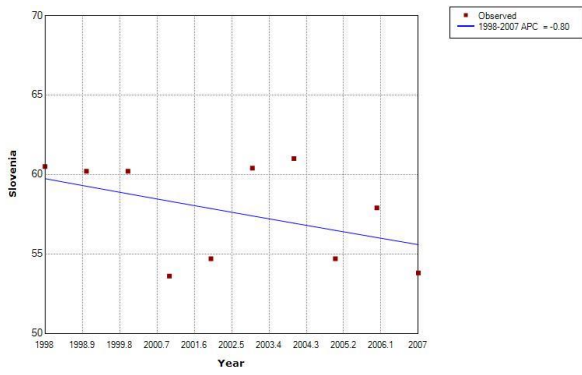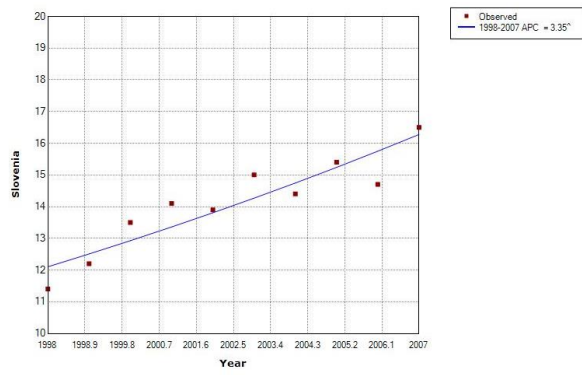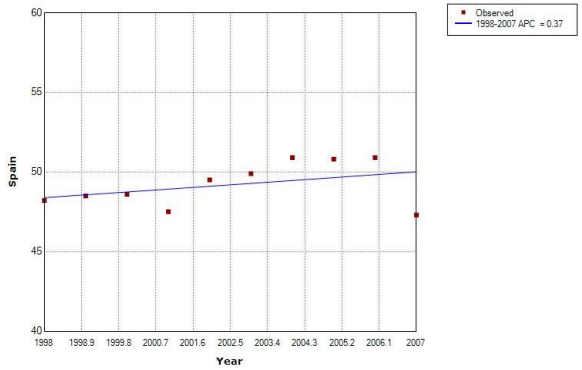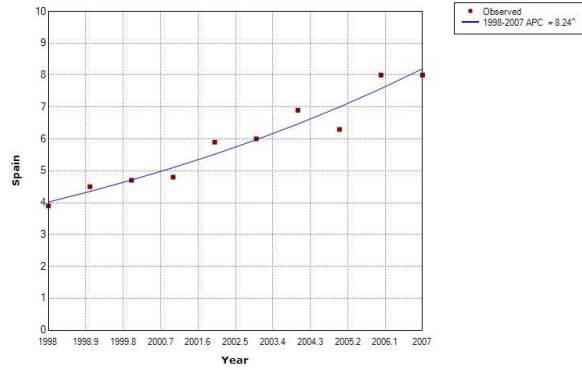

## 8) Eastern Europe

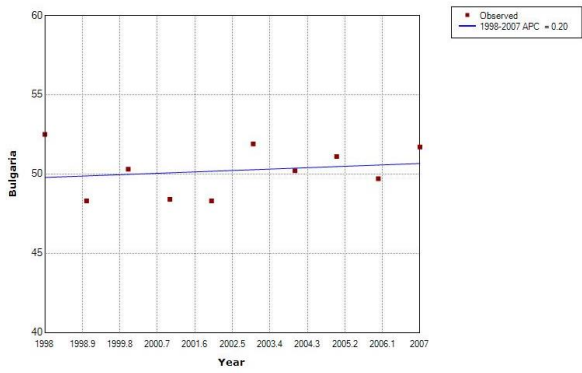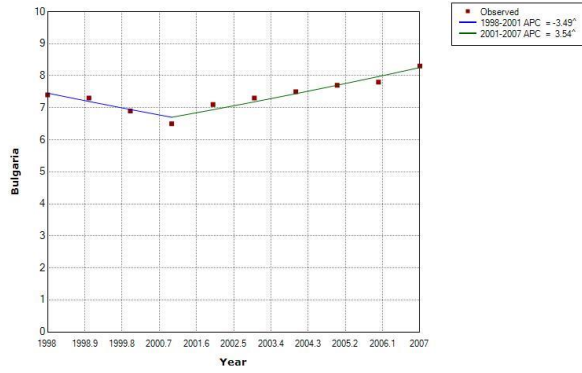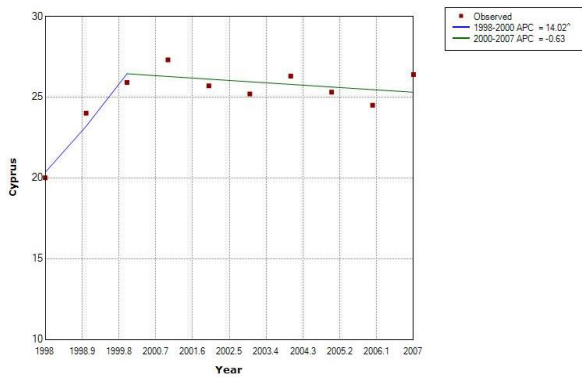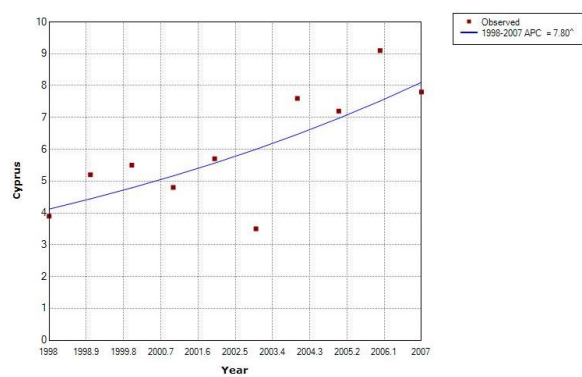

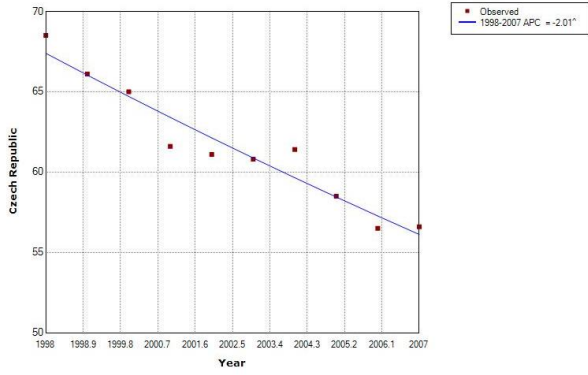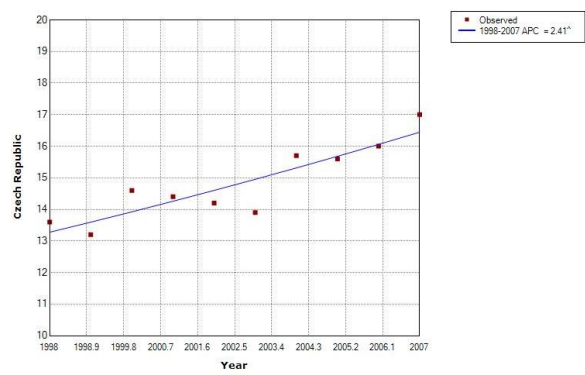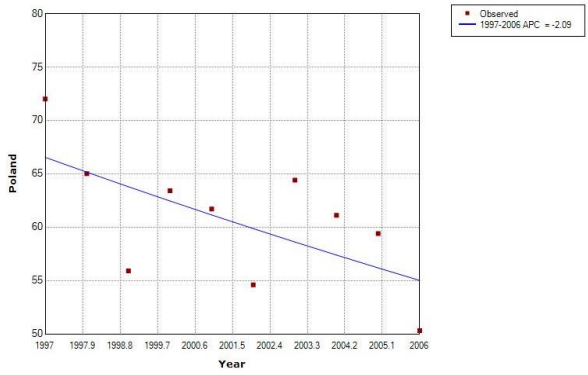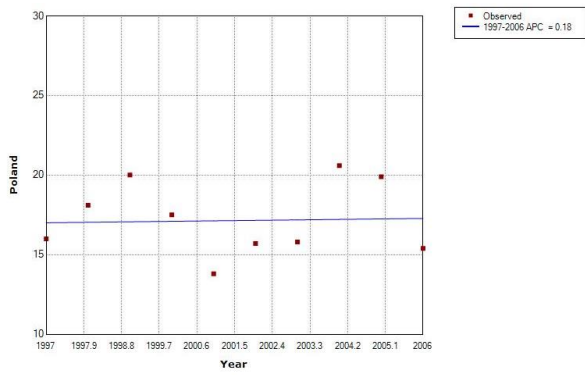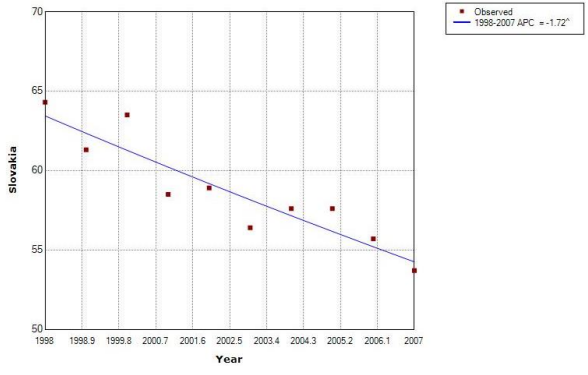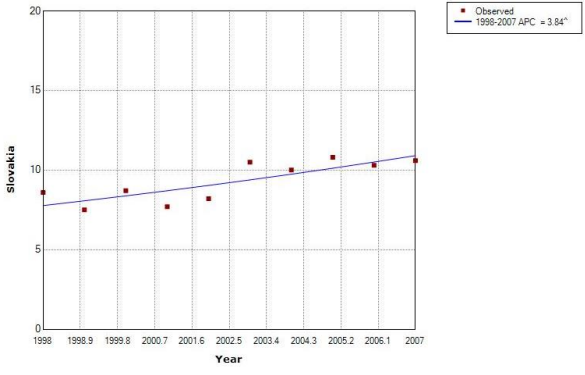

**Supplementary Figure 3 Findings from the joinpoint regression analysis of the global mortality rates of lung cancer (Left: Male, Right: Female)**

**1) Latin America and the Caribbean**

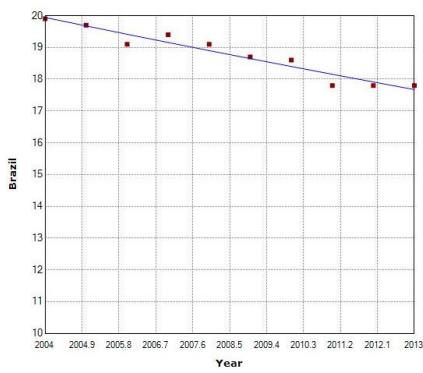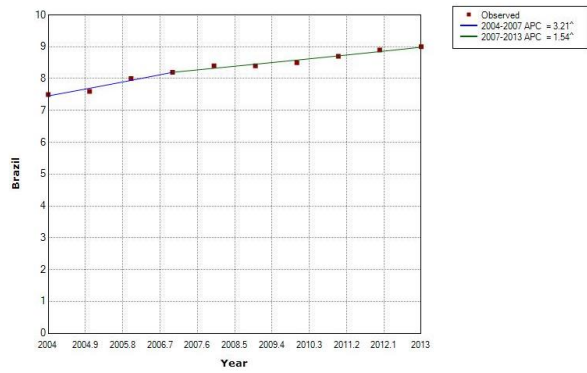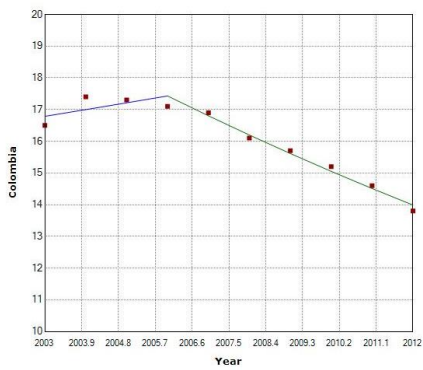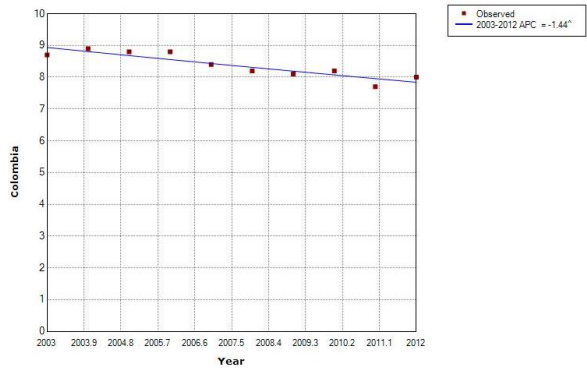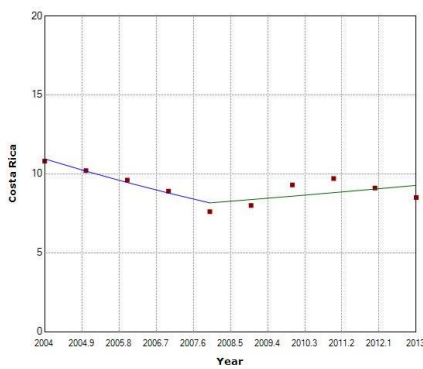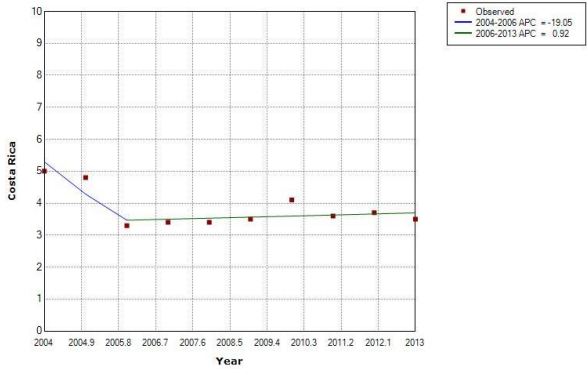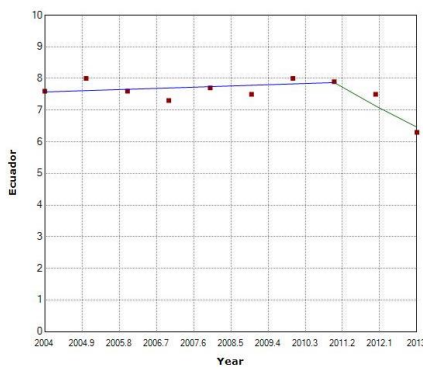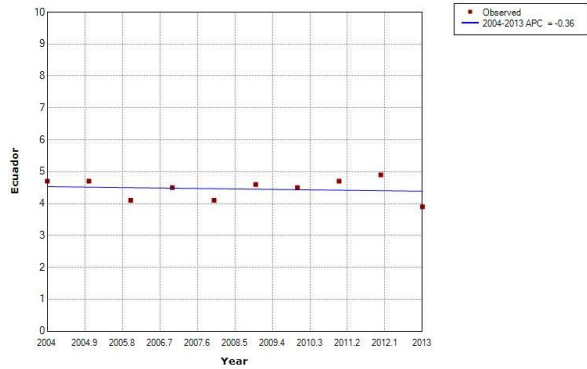

## 2) Northern America

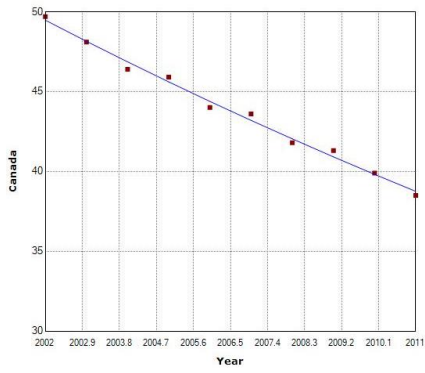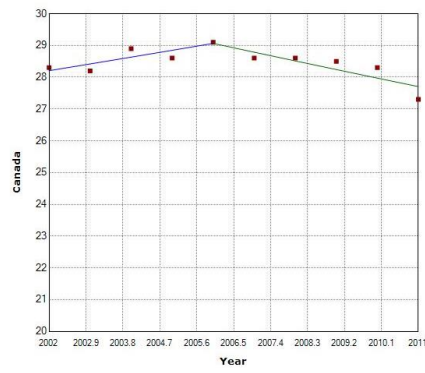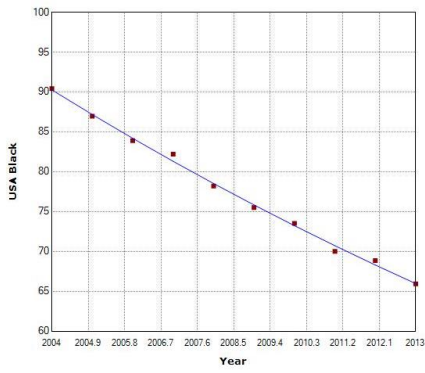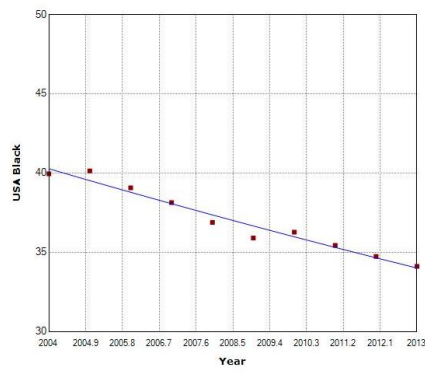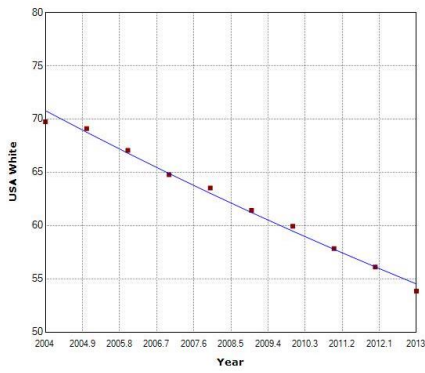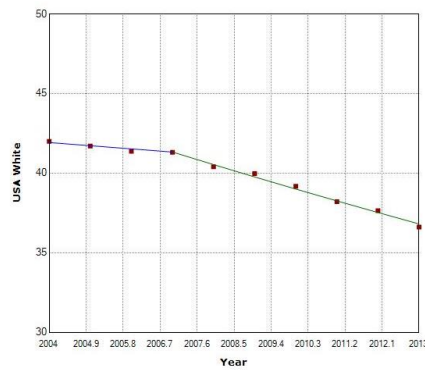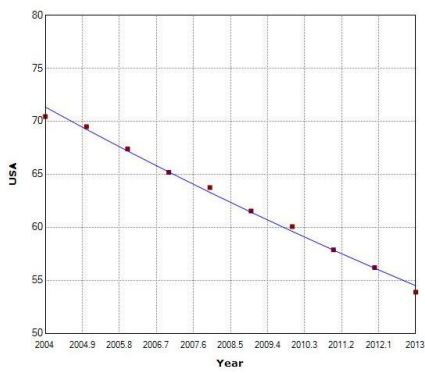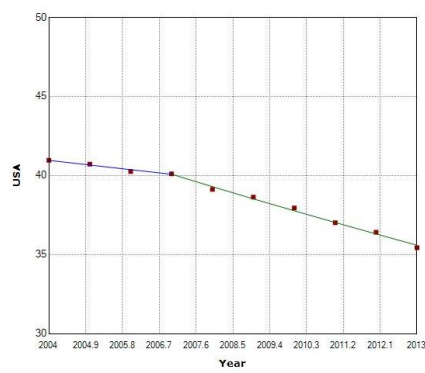

### 3) Asia

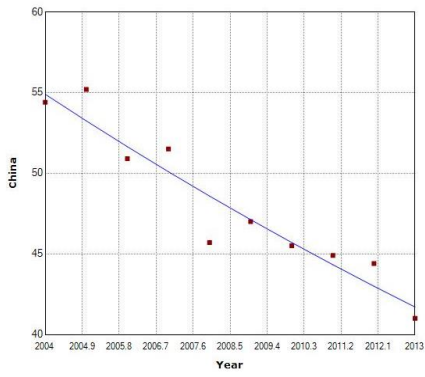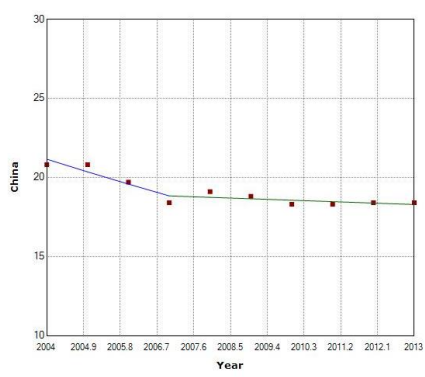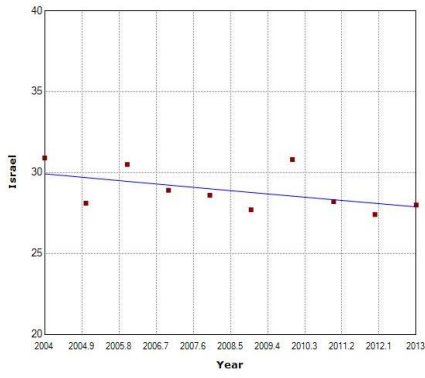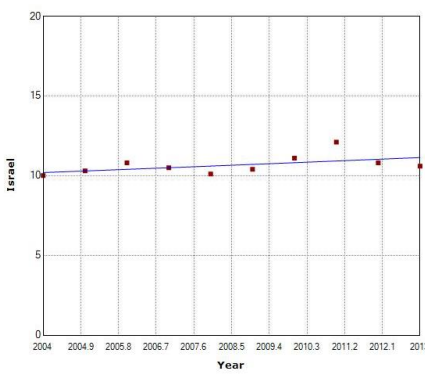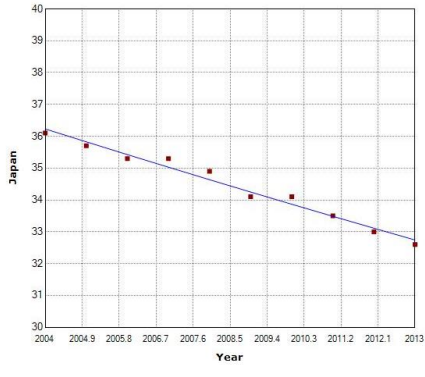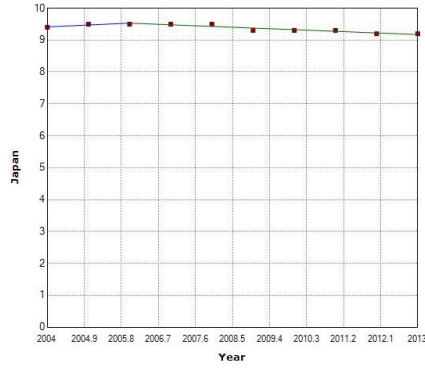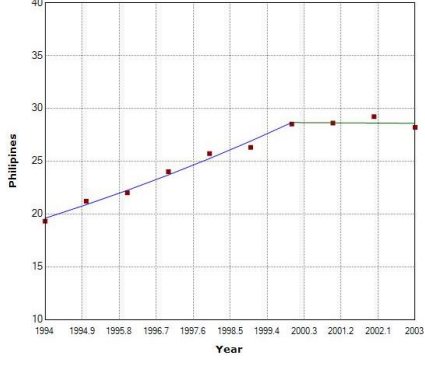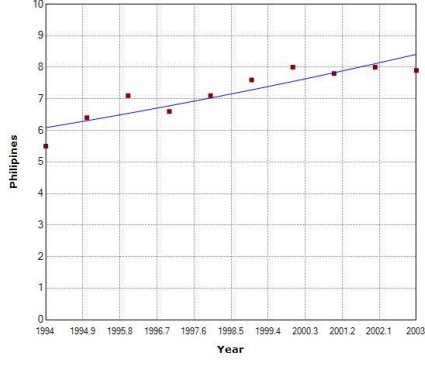

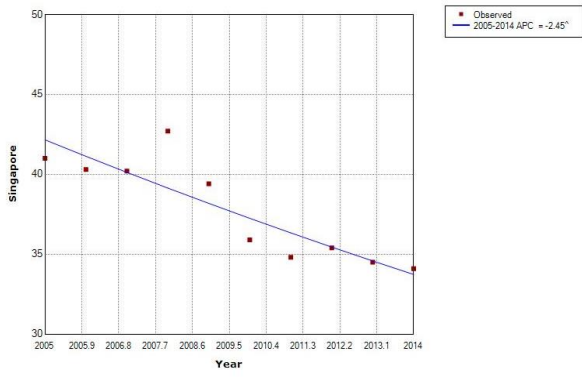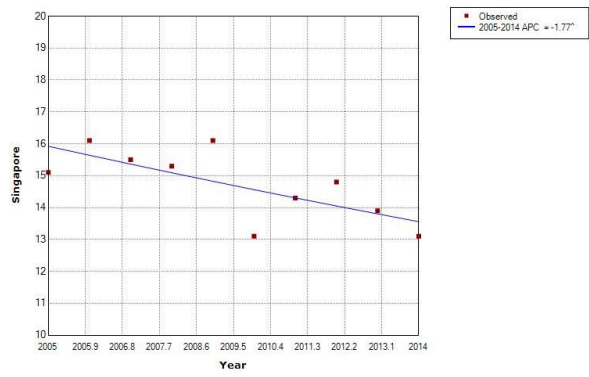

#### 4) Oceania

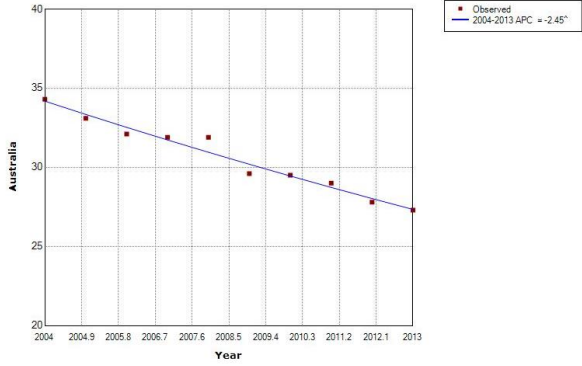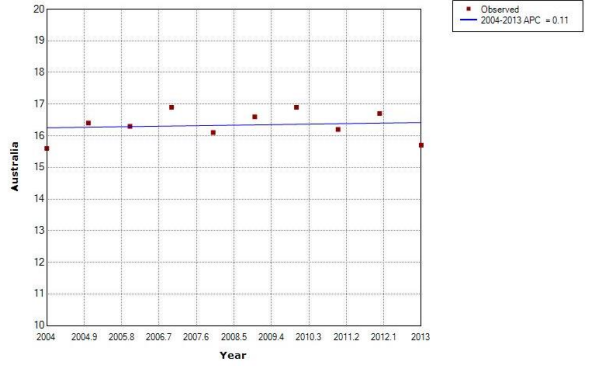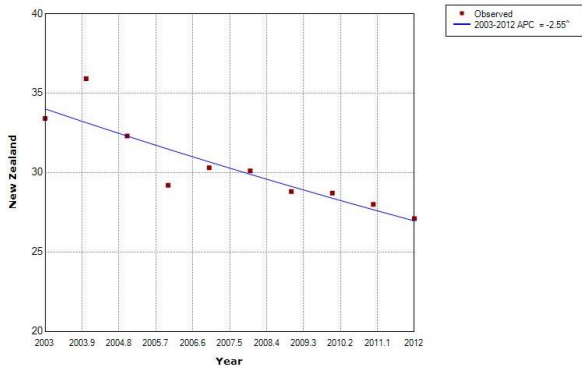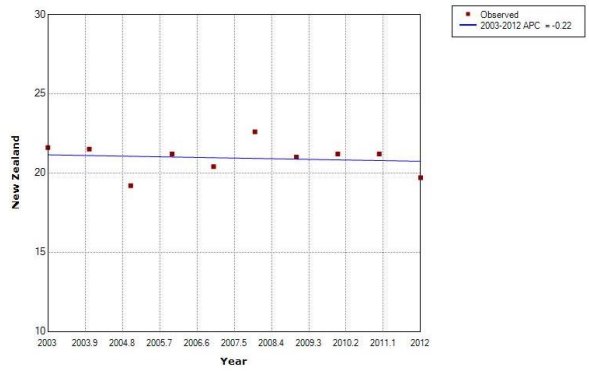

#### 5) Northern Europe

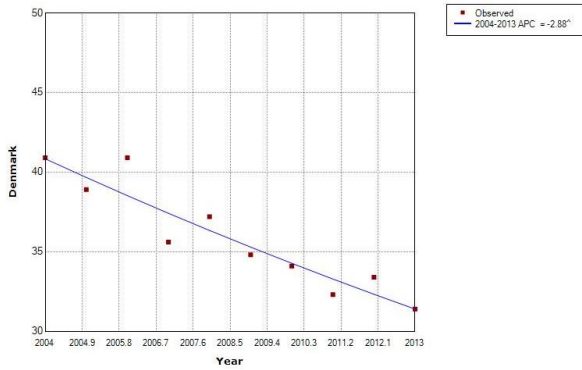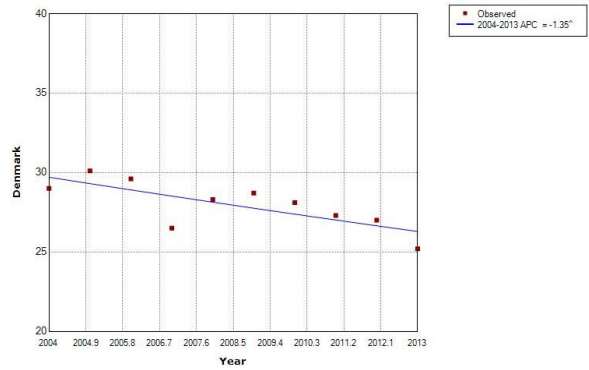



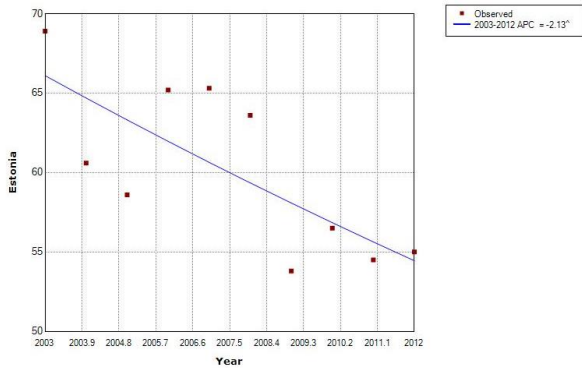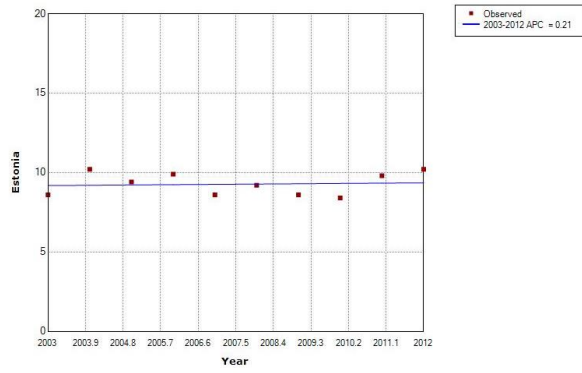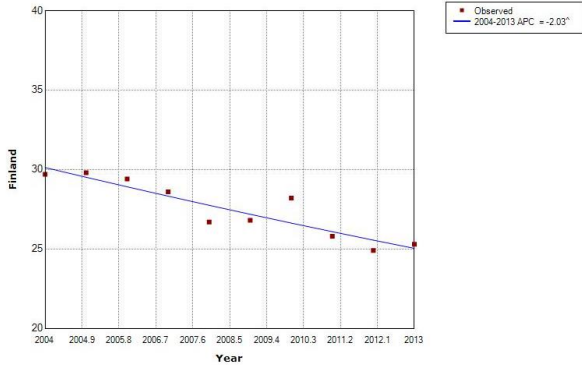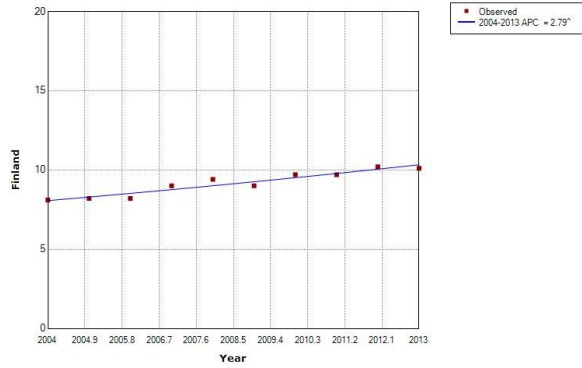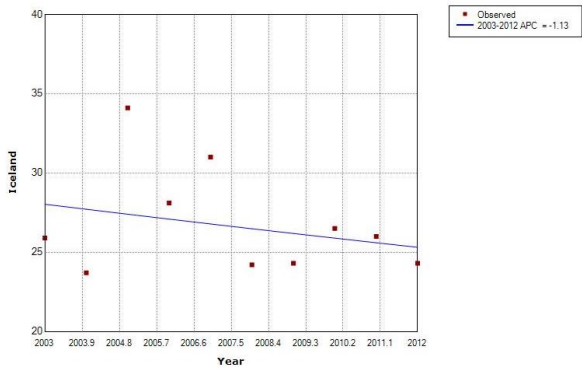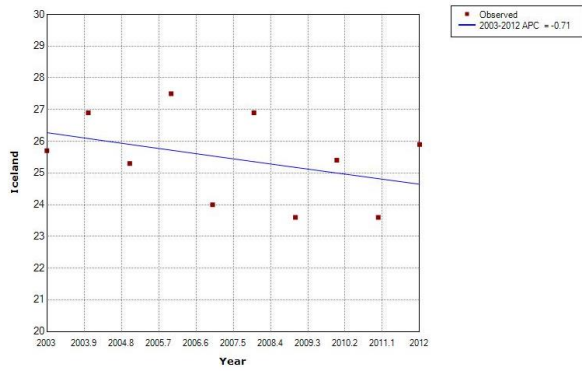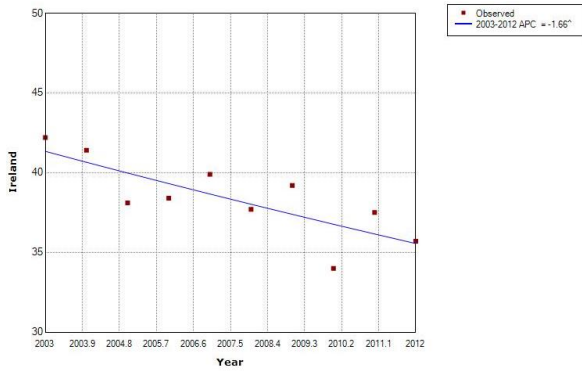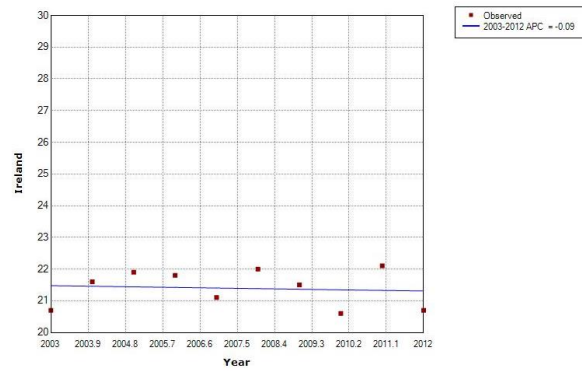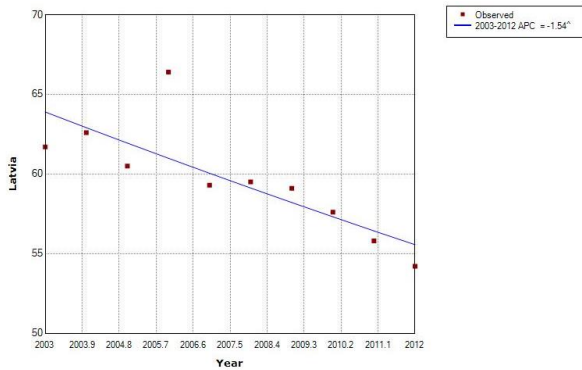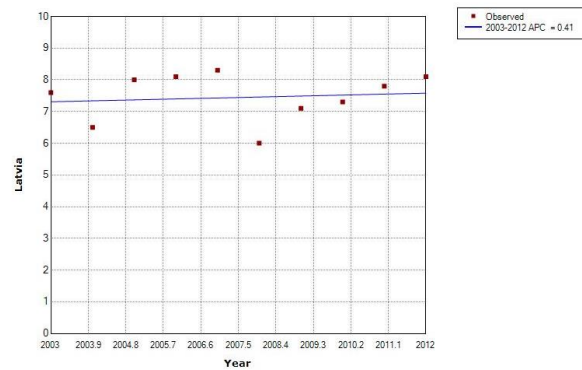

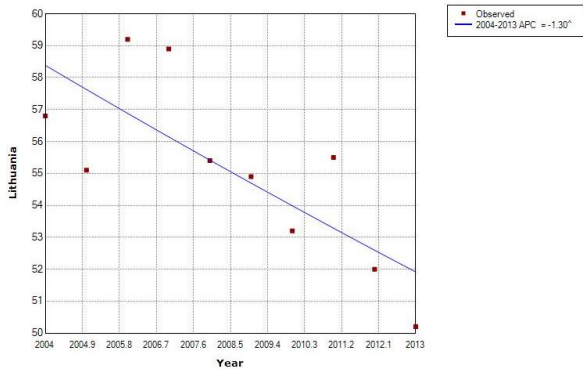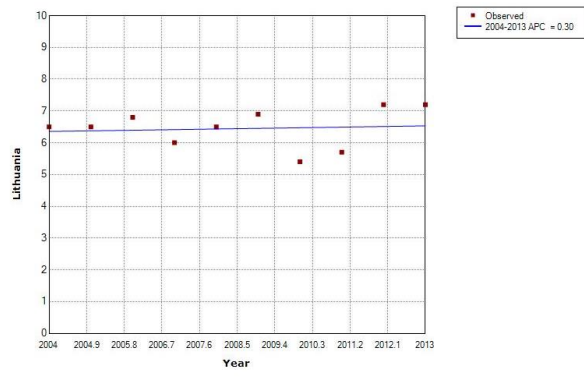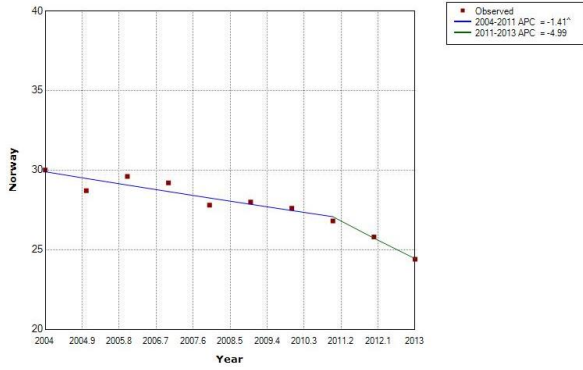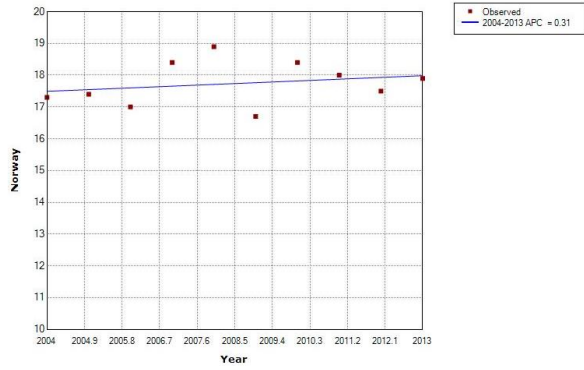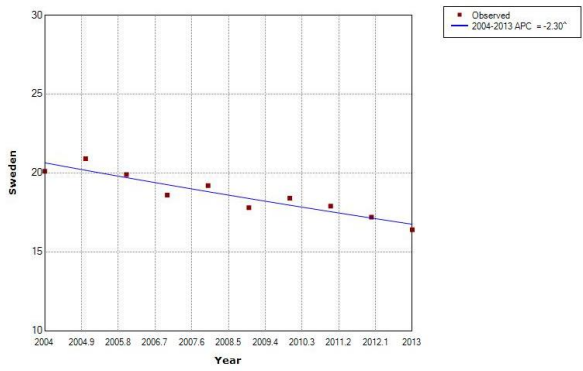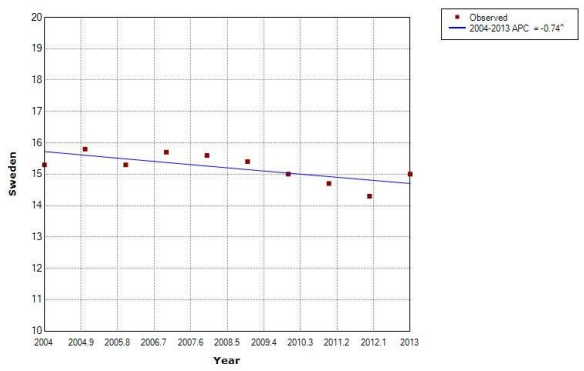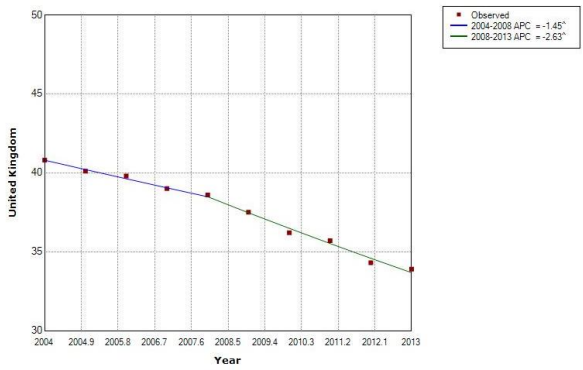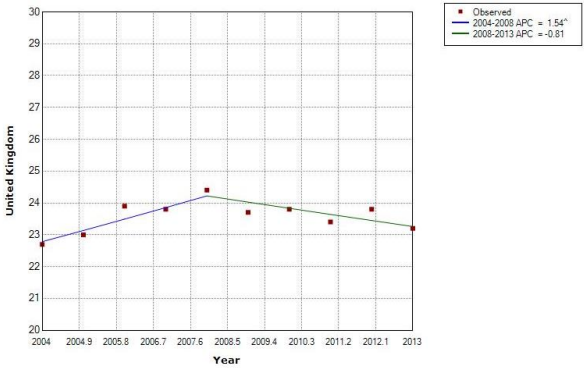

## 6) Western Europe

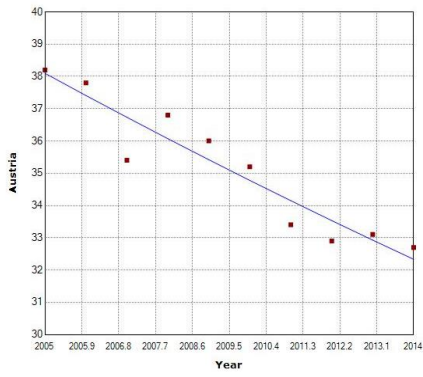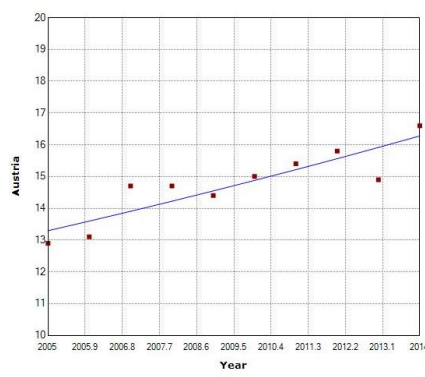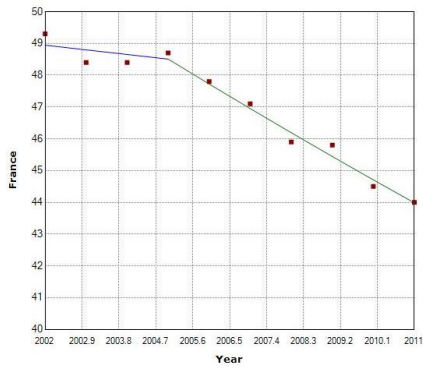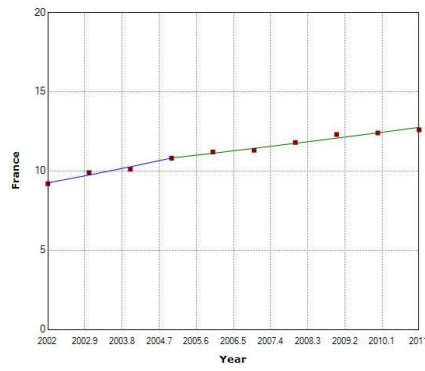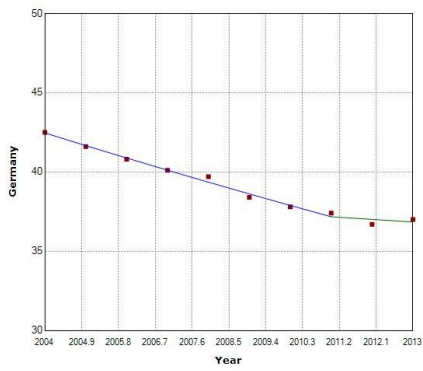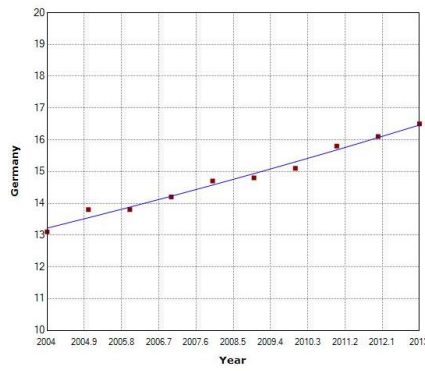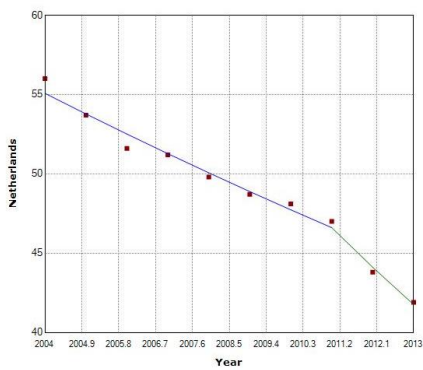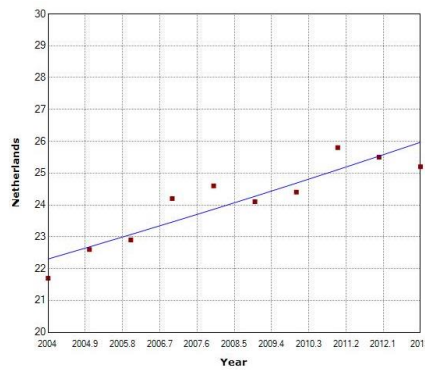

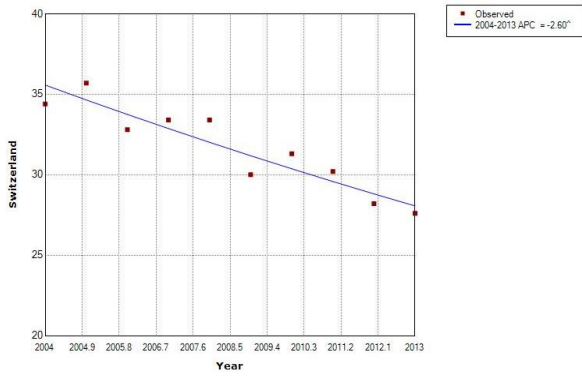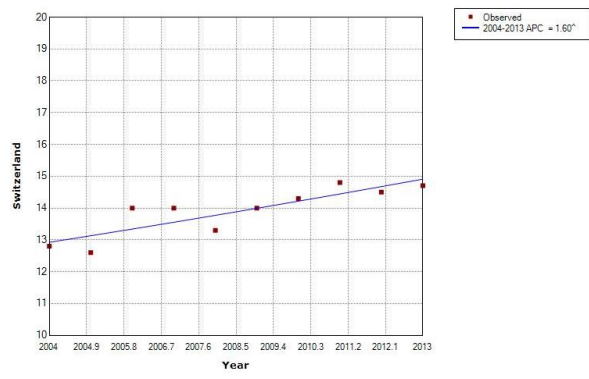

## 7) Southern Europe

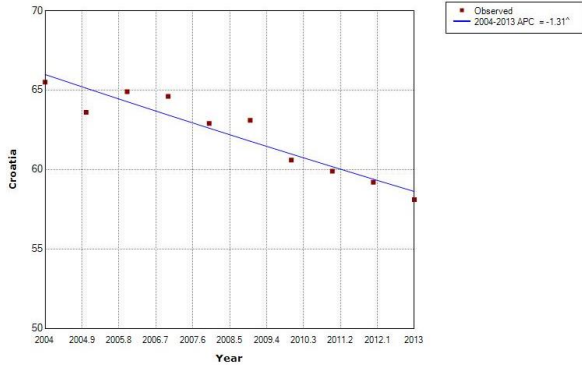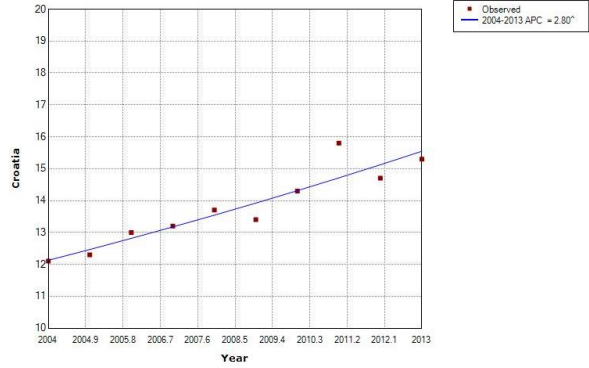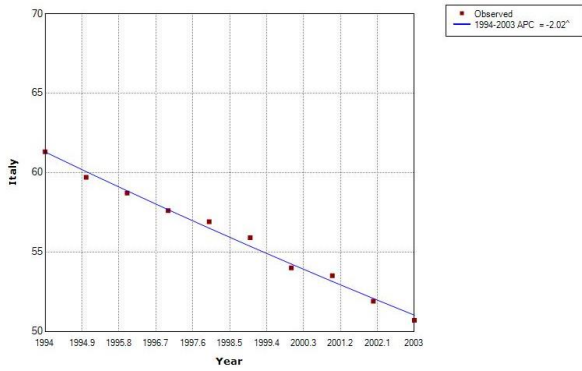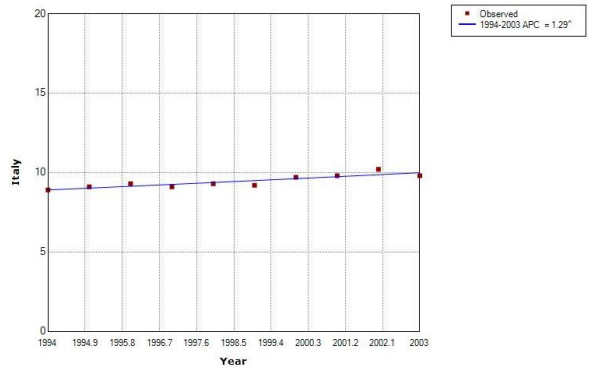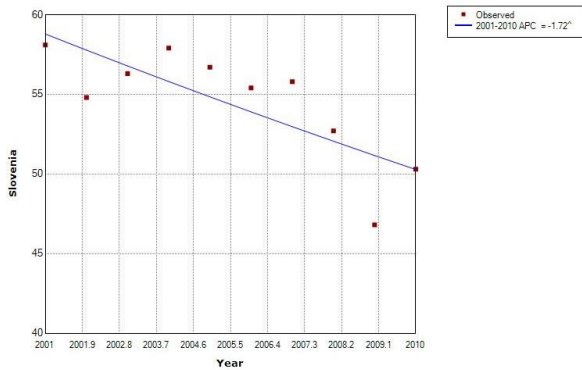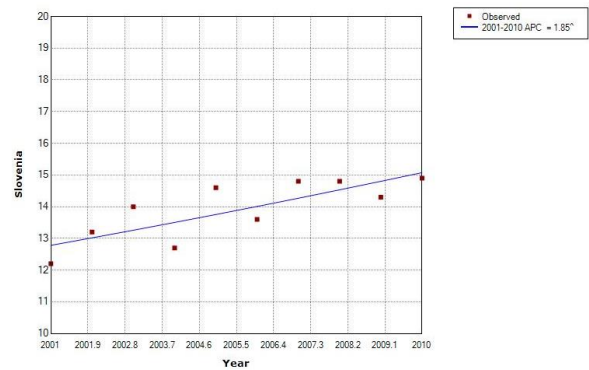

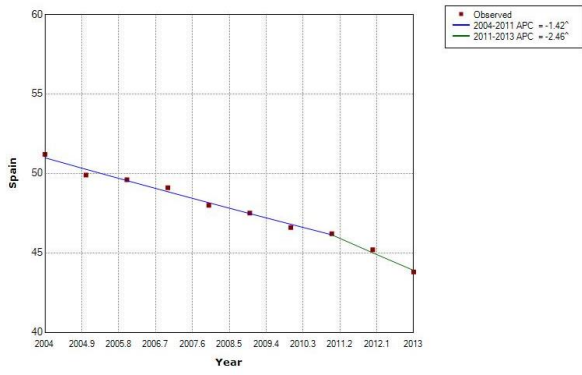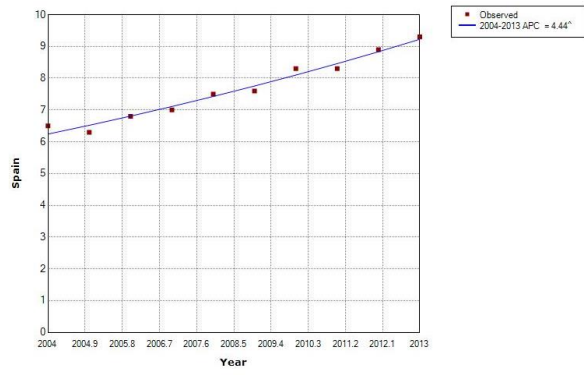

## 8) Eastern Europe

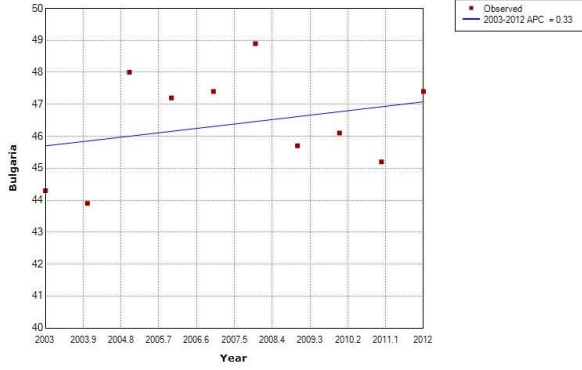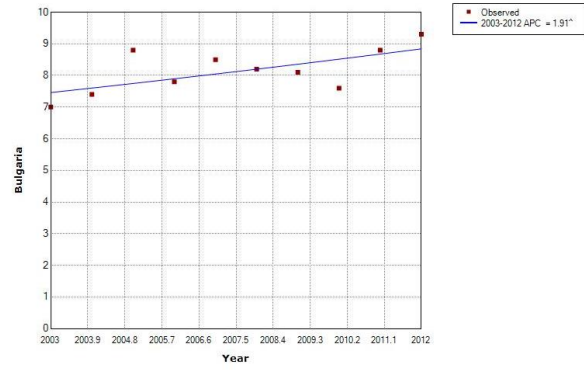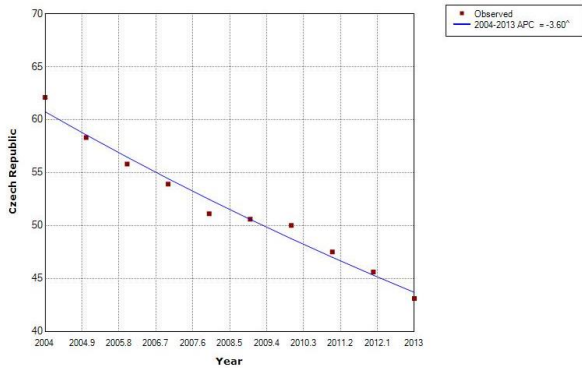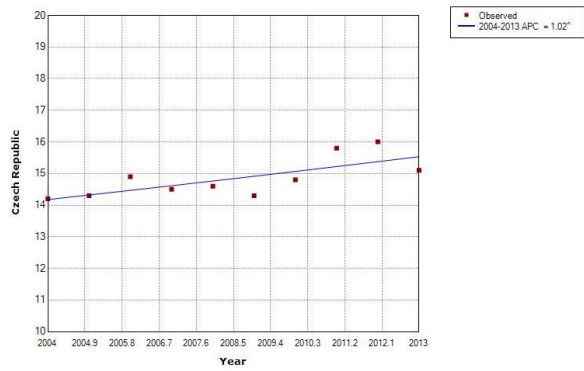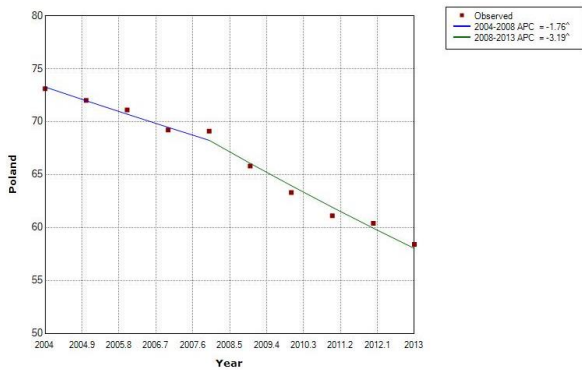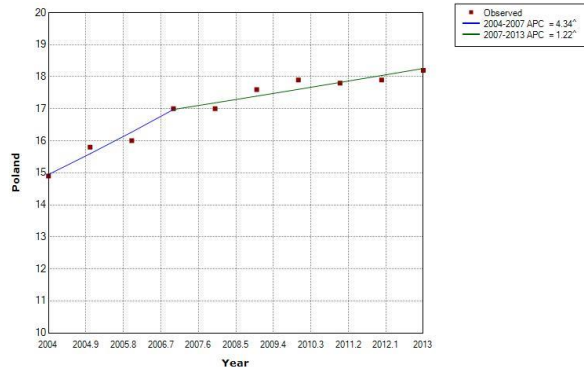

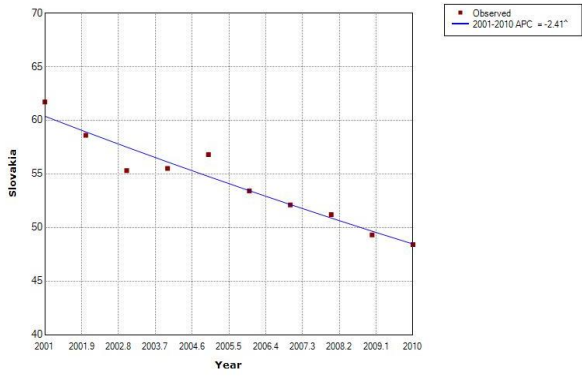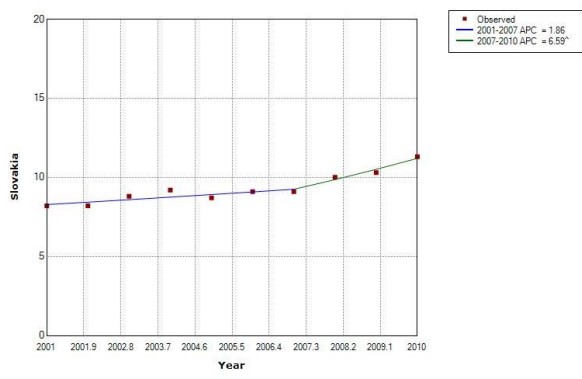

Supplement: 41598_2017_14513_MOESM1_ESM.pdf [file 41598_2017_14513_MOESM1_ESM.pdf]
